# Supplementary material
Source: PubMed Central journal article supplement (PMC6806427)
Supplement: jamainternmed-e194446-s003.pdf [file jamainternmed-e194446-s003.pdf]

## Data Sharing Statement

Wang. Effect of the Tailored, Family-Involved Hospital Elder Life Program on Postoperative Delirium and Function in Older Adults. *JAMA Intern Med*. Published October 21, 2019.  
10.1001/jamainternmed.2019.4446

### Data

**Data available:** Yes

**Data types:** Deidentified participant data

**How to access data:** The datasets used and/or analyzed during the current study are available from the corresponding author on reasonable request. Email to Jirong Yue: [yuejirong11@hotmail.com](mailto:yuejirong11@hotmail.com)

**When available:** beginning date: 06-01-2020, end date: 06-01-2023

### Supporting Documents

**Document types:** None

### Additional Information

**Who can access the data:** Email to Jirong Yue:  
[yuejirong11@hotmail.com](mailto:yuejirong11@hotmail.com)

**Types of analyses:** For individual participant data meta-analysis.

**Mechanisms of data availability:** After approval of a proposal
